# Supplementary material
Source: publisher figshare collection journal article supplement (https://future-science-group.figshare.com/ndownloader/files/31161004)
Supplement: Supplementary file 1 [file 31161004]

**Supplementary Table S2.** Fst p-values (above diagonal) and Fst genetic distances (below diagonal) among 14 populations for the *SLCO1B1* gene variant rs4149056.

|  | **Mexican Mestizos** | | **Mexican Native Americas** | | | **Latinamericans** | | | | | | | | |
| --- | --- | --- | --- | --- | --- | --- | --- | --- | --- | --- | --- | --- | --- | --- |
|  | Mestizo  YUC | Mestizo  JAL | Tarahumara | Nahua | Maya | Brazilean  1 | Brazilean  2 | Brazilean  3 | African  BR | Mulatto  BR | Amerindian  BR | Caucasian  BR | Chilean | Caucasian  USA |
| MestizoYUC | ***** | 0.1532 | 0.4414 | 0.3514 | 0.4685 | 0.3784 | 0.5586 | 0.0270 | 0.0090 | 0.9910 | **0.0000** | 0.8919 | 0.5856 | 0.9910 |
| MestizoJAL | 0.0113 | ***** | 0.6306 | 0.7207 | 0.5856 | 0.2432 | 0.1261 | 0.7928 | 0.2973 | 0.1171 | **0.0000** | 0.1171 | 0.2252 | 0.0270 |
| Tarahumara | 0.0006 | -0.0046 | ***** | 0.9910 | 0.9910 | 0.7568 | 0.3964 | 0.6306 | 0.0991 | 0.3333 | 0.0180 | 0.3063 | 0.5496 | 0.2523 |
| Nahua | 0.0006 | -0.0046 | -0.0070 | ***** | 0.9910 | 0.6847 | 0.4505 | 0.5496 | 0.1081 | 0.3063 | **0.0000** | 0.3423 | 0.4865 | 0.2703 |
| Maya | -0.0018 | -0.0028 | -0.0068 | -0.0068 | ***** | 0.8559 | 0.6487 | 0.3694 | 0.0360 | 0.3964 | **0.0000** | 0.4775 | 0.6847 | 0.2883 |
| Brazilean1 | -0.0010 | 0.0018 | -0.0032 | -0.0032 | -0.0040 | ***** | 0.5856 | 0.0631 | 0.0180 | 0.2613 | **0.0000** | 0.1892 | 0.7568 | 0.1351 |
| Brazilean2 | -0.0033 | 0.0058 | -0.0011 | -0.0011 | -0.0025 | -0.0008 | ***** | **0.0000** | **0.0000** | 0.6216 | **0.0000** | 0.5405 | 0.9910 | 0.3423 |
| Brazilean3 | 0.0130 | -0.0041 | -0.0029 | -0.0029 | -0.0014 | 0.0031 | 0.0071 | ***** | 0.0991 | **0.0000** | **0.0000** | **0.0000** | 0.0360 | **0.0000** |
| AfricanBR | 0.0419 | 0.0013 | 0.0121 | 0.0121 | 0.0164 | 0.0191 | 0.0255 | 0.0051 | ***** | 0.0090 | **0.0000** | **0.0000** | 0.0360 | **0.0000** |
| MulattoBR | -0.0042 | 0.0102 | 0.0017 | 0.0017 | -0.0003 | 0.0008 | -0.0009 | 0.0118 | 0.0321 | ***** | **0.0000** | 0.9910 | 0.6937 | 0.9640 |
| AmerindianBR | 0.0399 | 0.0949 | 0.0741 | 0.0741 | 0.0677 | 0.0780 | 0.0648 | 0.1198 | 0.1363 | 0.0531 | ***** | **0.0000** | **0.0000** | **0.0000** |
| CaucasianBR | -0.0038 | 0.0099 | 0.0017 | 0.0017 | -0.0002 | 0.0010 | -0.0007 | 0.0112 | 0.0304 | -0.0012 | 0.0574 | ***** | 0.6396 | 0.8649 |
| Chilean | -0.0042 | 0.0044 | -0.0027 | -0.0027 | -0.0041 | -0.0022 | -0.0026 | 0.0057 | 0.0268 | -0.0020 | 0.0578 | -0.0017 | ***** | 0.4595 |
| CaucasianUSA | -0.0037 | 0.0109 | 0.0026 | 0.0026 | 0.0006 | 0.0016 | -0.0003 | 0.0119 | 0.0311 | -0.0010 | 0.0572 | -0.0006 | -0.0013 | ***** |

JAL= Jalisco State (West, Mexico)

YUC= Yucatan State (Southeast, Mexico)

BR= Brazilian
